# Supplementary material for: Mesoxalate as Cu(ii)–Ln(iii) linker in the construction of MOFs in DMSO/water medium
Source: Royal Society of Chemistry journal article supplement (doi:10.1039/c5ce00999e), 2015-01-01
Supplement: c5ce00999e1.pdf [file c5ce00999e1.pdf]

## Electronic Supplementary Information

### Mesoxalate as Cu(II)-Ln(III) linker in the construction of MOFs in DMSO/water medium

B. Gil-Hernández,<sup>a</sup> P. Gili,<sup>a</sup> M. Quirós<sup>b</sup> and J. Sanchiz<sup>a,\*</sup>

<sup>a</sup>Departamento de Química, Facultad de Ciencias, Universidad de La Laguna, Tenerife, Spain.

<sup>b</sup>Departamento de Química Inorgánica, Facultad de Ciencias, Universidad de Granada, Granada, Spain.

#### Contents

**Fig. S1** TG plots of compounds **LaCu<sub>3</sub>**, **CeCu<sub>3</sub>**, **PrCu<sub>3</sub>** and **NdCu<sub>3</sub>**.

**Fig. S2** IR spectra **LaCu<sub>3</sub>**, **CeCu<sub>3</sub>**, **PrCu<sub>3</sub>** and **NdCu<sub>3</sub>**.

**Fig. S3** Simulated (vertical bar plot) and experimental XRPD spectra (colored) for compounds (a). **LaCu<sub>3</sub>**. (b). **CeCu<sub>3</sub>**. (c). **PrCu<sub>3</sub>**. (d). and **NdCu<sub>3</sub>**.

**Table S1.** Selected distances and angles for **LaCu<sub>3</sub>**.

**Table S2.** Selected distances and angles for **CeCu<sub>3</sub>**

**Table S3.** Selected distances and angles for **PrCu<sub>3</sub>**

**Table S4.** Selected distances and angles for **NdCu<sub>3</sub>**

**Table S5.** Selected distances and angles for **EuCu<sub>3</sub>**

**References**

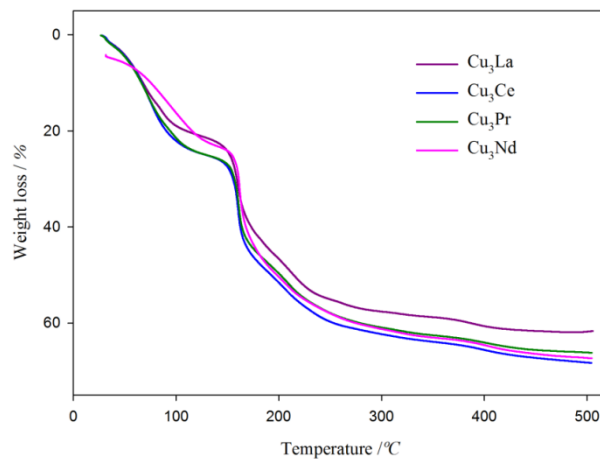

**Fig. S1** TG plots of compounds **LaCu<sub>3</sub>**, **CeCu<sub>3</sub>**, **PrCu<sub>3</sub>** and **NdCu<sub>3</sub>**.

IR most intense bands correspond to asymmetric and symmetric carboxylate absorptions  $\nu_{as}$  and  $\nu_s$ : 1638 (s,b) and 1377 (s)  $\text{cm}^{-1}$ , respectively (average values).

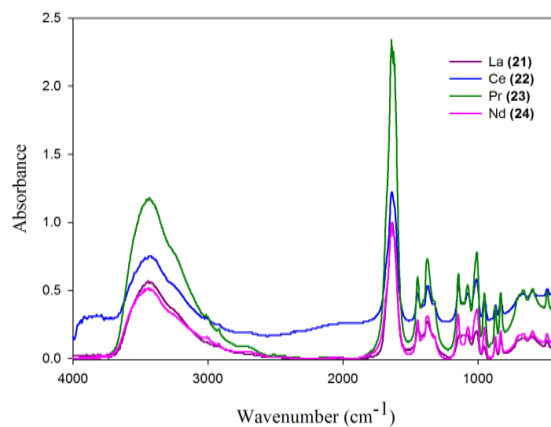

**Fig. S2** IR spectra **LaCu<sub>3</sub>**, **CeCu<sub>3</sub>**, **PrCu<sub>3</sub>** and **NdCu<sub>3</sub>**.

The C-O stretching bands are observed around 1144 (vs)  $\text{cm}^{-1}$  and O-H bands in the range of 3400-3500  $\text{cm}^{-1}$ .<sup>1, 2</sup> The values observed are within the expected ranges and Figure S2 shows that all the compounds are IR-isostructural

### Powder X-Ray Diffraction Patterns

The Powder Diffraction Patterns matched very well the simulated ones for compounds **LaCu<sub>3</sub>**, **CeCu<sub>3</sub>**, **PrCu<sub>3</sub>** and **NdCu<sub>3</sub>** (see Figure S3). So the polycrystalline samples correspond to the single crystals and they constitute pure phases. The testing tubes containing the solutions to get the compounds involving the other Ln(III) cations (Gd, Tb, Dy, Er and Yb) afforded low-crystallinity materials which did not allow us neither the determination of the structure nor the magnetic properties.

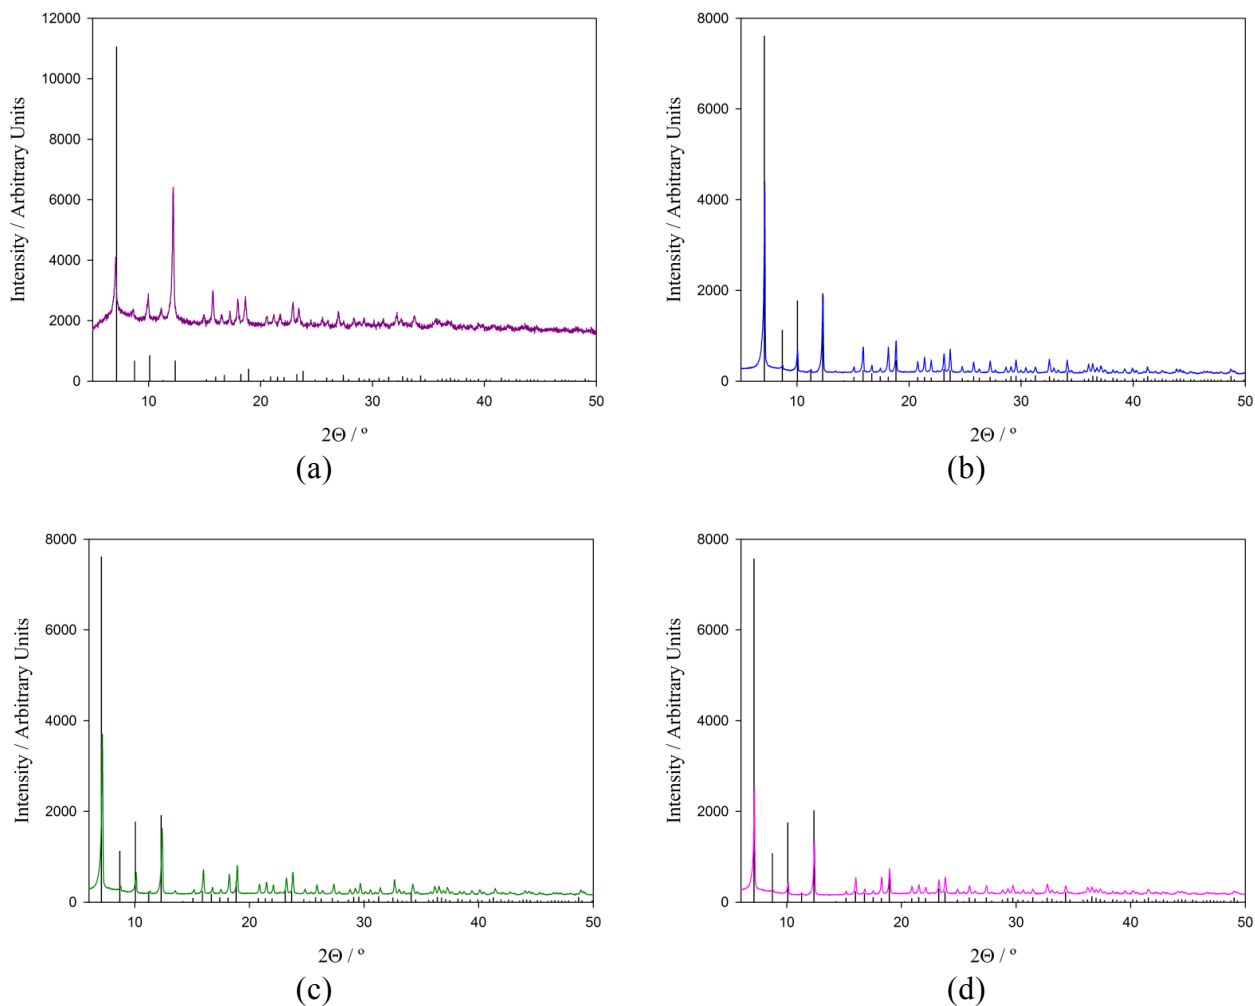

**Fig. S3** Simulated (vertical bar plot) and experimental XRPD spectra (colored) for compounds **LaCu<sub>3</sub>**, (a); **CeCu<sub>3</sub>**, (b); **PrCu<sub>3</sub>**, (c); and **NdCu<sub>3</sub>**, (d).

**Table S1.** Selected distances and angles for **LaCu<sub>3</sub>**.

|                                       |            |                                         |            |
|---------------------------------------|------------|-----------------------------------------|------------|
| La—O1W                                | 2.409(13)  | C1—C2                                   | 1.532(10)  |
| La—O6 <sup>i</sup>                    | 2.556(5)   | C2—O3                                   | 1.376(8)   |
| La—O6                                 | 2.556(5)   | C2—O4                                   | 1.404(8)   |
| La—O6 <sup>ii</sup>                   | 2.556(5)   | C2—C3                                   | 1.544(9)   |
| La—O4 <sup>i</sup>                    | 2.623(5)   | O3—Cu <sup>iv</sup>                     | 1.946(5)   |
| La—O4 <sup>ii</sup>                   | 2.623(5)   | C3—O6                                   | 1.241(9)   |
| La—O4                                 | 2.623(5)   | C3—O5                                   | 1.281(9)   |
| La—O2 <sup>i</sup>                    | 2.623(6)   | O5—Cu <sup>iv</sup>                     | 1.938(5)   |
| La—O2                                 | 2.623(6)   | S1S—O1S                                 | 1.506(13)  |
| La—O2 <sup>ii</sup>                   | 2.623(6)   | S1S—C2S                                 | 1.768(10)  |
| Cu—O3                                 | 1.929(5)   | S1S—C1S                                 | 1.77(1)    |
| Cu—O5 <sup>iii</sup>                  | 1.938(5)   | S2S—O2S                                 | 1.47(2)    |
| Cu—O1                                 | 1.944(6)   | S2S—C3S                                 | 1.772(10)  |
| Cu—O3 <sup>iii</sup>                  | 1.946(5)   | S2S—C4S                                 | 1.779(10)  |
| Cu—O1S                                | 2.471(8)   | S3S—O3S                                 | 1.50(2)    |
| C1—O1                                 | 1.245(10)  | S3S—C5S                                 | 1.759(10)  |
| C1—O2                                 | 1.249(10)  | S3S—C6S                                 | 1.771(10)  |
| O1W—La—O6 <sup>i</sup>                | 138.01(13) | O2 <sup>i</sup> —La—O2 <sup>ii</sup>    | 109.24(14) |
| O1W—La—O6                             | 138.01(13) | O2—La—O2 <sup>ii</sup>                  | 109.24(14) |
| O6 <sup>i</sup> —La—O6                | 70.8(2)    | O3—Cu—O5 <sup>iii</sup>                 | 175.0(2)   |
| O1W—La—O6 <sup>ii</sup>               | 138.01(13) | O3—Cu—O1                                | 85.6(2)    |
| O6 <sup>i</sup> —La—O6 <sup>ii</sup>  | 70.8(2)    | O5 <sup>iii</sup> —Cu—O1                | 92.2(2)    |
| O6—La—O6 <sup>ii</sup>                | 70.8(2)    | O3—Cu—O3 <sup>iii</sup>                 | 95.9(3)    |
| O1W—La—O4 <sup>i</sup>                | 93.19(11)  | O5 <sup>iii</sup> —Cu—O3 <sup>iii</sup> | 85.6(2)    |
| O6 <sup>i</sup> —La—O4 <sup>i</sup>   | 62.73(16)  | O1—Cu—O3 <sup>iii</sup>                 | 170.4(3)   |
| O6—La—O4 <sup>i</sup>                 | 73.44(16)  | O3—Cu—O1S                               | 81.1(2)    |
| O6 <sup>ii</sup> —La—O4 <sup>i</sup>  | 128.25(17) | O5 <sup>iii</sup> —Cu—O1S               | 103.9(2)   |
| O1W—La—O4 <sup>ii</sup>               | 93.19(11)  | O1—Cu—O1S                               | 108.8(2)   |
| O6 <sup>i</sup> —La—O4 <sup>ii</sup>  | 73.44(16)  | O3 <sup>iii</sup> —Cu—O1S               | 80.8(2)    |
| O6—La—O4 <sup>ii</sup>                | 128.25(17) | O1—C1—O2                                | 125.3(8)   |
| O6 <sup>ii</sup> —La—O4 <sup>ii</sup> | 62.73(16)  | O1—C1—C2                                | 118.5(7)   |
| O4 <sup>i</sup> —La—O4 <sup>ii</sup>  | 119.69(2)  | O2—C1—C2                                | 116.1(7)   |
| O1W—La—O4                             | 93.19(11)  | C1—O1—Cu                                | 111.1(5)   |
| O6 <sup>i</sup> —La—O4                | 128.25(17) | C1—O2—La                                | 118.9(5)   |
| O6—La—O4                              | 62.73(16)  | O3—C2—O4                                | 113.7(6)   |
| O6 <sup>ii</sup> —La—O4               | 73.44(16)  | O3—C2—C1                                | 110.8(6)   |
| O4 <sup>i</sup> —La—O4                | 119.69(2)  | O4—C2—C1                                | 108.8(6)   |
| O4 <sup>ii</sup> —La—O4               | 119.69(2)  | O3—C2—C3                                | 111.4(6)   |
| O1W—La—O2 <sup>i</sup>                | 70.30(14)  | O4—C2—C3                                | 104.1(6)   |
| O6 <sup>i</sup> —La—O2 <sup>i</sup>   | 68.00(19)  | C1—C2—C3                                | 107.7(6)   |
| O6—La—O2 <sup>i</sup>                 | 129.02(17) | C2—O3—Cu                                | 111.7(4)   |
| O6 <sup>ii</sup> —La—O2 <sup>i</sup>  | 119.78(19) | C2—O3—Cu <sup>iv</sup>                  | 111.3(4)   |
| O4 <sup>i</sup> —La—O2 <sup>i</sup>   | 61.71(16)  | Cu—O3—Cu <sup>iv</sup>                  | 114.5(3)   |
| O4 <sup>ii</sup> —La—O2 <sup>i</sup>  | 64.65(18)  | C2—O4—La                                | 107.4(4)   |
| O4—La—O2 <sup>i</sup>                 | 163.41(19) | O6—C3—O5                                | 124.9(7)   |
| O1W—La—O2                             | 70.30(14)  | O6—C3—C2                                | 118.0(7)   |
| O6 <sup>i</sup> —La—O2                | 119.78(19) | O5—C3—C2                                | 117.2(6)   |
| O6—La—O2                              | 68.00(19)  | C3—O5—Cu <sup>iv</sup>                  | 111.2(4)   |
| O6 <sup>ii</sup> —La—O2               | 129.02(17) | C3—O6—La                                | 118.2(5)   |
| O4 <sup>i</sup> —La—O2                | 64.65(18)  | O1S—S1S—C2S                             | 107.6(14)  |
| O4 <sup>ii</sup> —La—O2               | 163.41(19) | O1S—S1S—C1S                             | 106.8(12)  |
| O4—La—O2                              | 61.71(16)  | C2S—S1S—C1S                             | 99.6(11)   |
| O2 <sup>i</sup> —La—O2                | 109.24(14) | S1S—O1S—Cu                              | 138.1(14)  |
| O1W—La—O2 <sup>ii</sup>               | 70.30(14)  | O2S—S2S—C3S                             | 108.9(12)  |
| O6 <sup>i</sup> —La—O2 <sup>ii</sup>  | 129.02(17) | O2S—S2S—C4S                             | 108.4(13)  |
| O6—La—O2 <sup>ii</sup>                | 119.78(19) | C3S—S2S—C4S                             | 98.(1)     |
| O6 <sup>ii</sup> —La—O2 <sup>ii</sup> | 68.00(19)  | O3S—S3S—C5S                             | 108.9(13)  |
| O4 <sup>i</sup> —La—O2 <sup>ii</sup>  | 163.41(19) | O3S—S3S—C6S                             | 107.7(13)  |
| O4 <sup>ii</sup> —La—O2 <sup>ii</sup> | 61.71(16)  | C5S—S3S—C6S                             | 100.3(11)  |
| O4—La—O2 <sup>ii</sup>                | 64.65(18)  |                                         |            |

(i) y, z, x; (ii) z, x, y; (iii) -0.5+y, 0.5-z, -x; (iv) -z, 0.5+x, 0.5-y.

**Table S2.** Selected distances and angles for compound **CeCu<sub>3</sub>**

|                                         |            |                                          |             |
|-----------------------------------------|------------|------------------------------------------|-------------|
| C1—O1                                   | 1.249(6)   | O5—Ce1                                   | 2.557(3)    |
| C1—O2                                   | 1.258(6)   | O4—Ce1                                   | 2.642(3)    |
| C1—C2                                   | 1.539(7)   | O2—Ce1                                   | 2.582(4)    |
| C2—O3                                   | 1.389(6)   | O1—Cu1 <sup>i</sup>                      | 1.943(4)    |
| C2—O4                                   | 1.402(6)   | O1S—S1                                   | 1.395(8)    |
| C2—C3                                   | 1.542(7)   | Cu1—O1 <sup>ii</sup>                     | 1.943(4)    |
| C3—O6                                   | 1.234(6)   | Cu1—O3 <sup>ii</sup>                     | 1.956(3)    |
| C3—O5                                   | 1.235(6)   | Ce1—O5 <sup>iii</sup>                    | 2.557(3)    |
| C1S—S1                                  | 1.772(10)  | Ce1—O5 <sup>iv</sup>                     | 2.557(3)    |
| C2S—S1                                  | 1.776(10)  | Ce1—O2 <sup>iii</sup>                    | 2.582(4)    |
| O6—Cu1                                  | 1.940(3)   | Ce1—O2 <sup>iv</sup>                     | 2.582(4)    |
| O3—Cu1                                  | 1.937(3)   | Ce1—O4 <sup>iii</sup>                    | 2.642(3)    |
| O3—Cu1 <sup>i</sup>                     | 1.956(3)   | Ce1—O4 <sup>iv</sup>                     | 2.642(3)    |
| O1W—Ce1                                 | 2.487(8)   |                                          |             |
| O1—C1—O2                                | 125.8(5)   | O5—Ce1—O2                                | 68.33(12)   |
| O1—C1—C2                                | 118.4(4)   | O5 <sup>iv</sup> —Ce1—O2                 | 120.48(12)  |
| O2—C1—C2                                | 115.8(5)   | O1W—Ce1—O2 <sup>iii</sup>                | 69.88(9)    |
| O3—C2—O4                                | 112.3(4)   | O5 <sup>iii</sup> —Ce1—O2 <sup>iii</sup> | 68.33(12)   |
| O3—C2—C1                                | 110.7(4)   | O5—Ce1—O2 <sup>iii</sup>                 | 120.48(12)  |
| O4—C2—C1                                | 105.9(4)   | O5 <sup>iv</sup> —Ce1—O2 <sup>iii</sup>  | 128.94(11)  |
| O3—C2—C3                                | 111.8(4)   | O2—Ce1—O2 <sup>iii</sup>                 | 108.81(9)   |
| O4—C2—C3                                | 106.0(4)   | O1W—Ce1—O2 <sup>iv</sup>                 | 69.88(9)    |
| C1—C2—C3                                | 109.9(4)   | O5 <sup>iii</sup> —Ce1—O2 <sup>iv</sup>  | 120.48(12)  |
| O6—C3—O5                                | 126.1(5)   | O5—Ce1—O2 <sup>iv</sup>                  | 128.94(11)  |
| O6—C3—C2                                | 117.5(4)   | O5 <sup>iv</sup> —Ce1—O2 <sup>iv</sup>   | 68.33(12)   |
| O5—C3—C2                                | 116.5(4)   | O2—Ce1—O2 <sup>iv</sup>                  | 108.81(9)   |
| C3—O6—Cu1                               | 112.1(3)   | O2 <sup>iii</sup> —Ce1—O2 <sup>iv</sup>  | 108.81(9)   |
| C2—O3—Cu1                               | 110.1(3)   | O1W—Ce1—O4 <sup>iii</sup>                | 92.95(8)    |
| C2—O3—Cu1 <sup>i</sup>                  | 111.2(3)   | O5 <sup>iii</sup> —Ce1—O4 <sup>iii</sup> | 62.9(1)     |
| Cu1—O3—Cu1 <sup>i</sup>                 | 114.64(17) | O5—Ce1—O4 <sup>iii</sup>                 | 128.53(11)  |
| C3—O5—Ce1                               | 119.3(3)   | O5 <sup>iv</sup> —Ce1—O4 <sup>iii</sup>  | 73.63(11)   |
| C2—O4—Ce1                               | 106.5(3)   | O2—Ce1—O4 <sup>iii</sup>                 | 162.69(12)  |
| C1—O2—Ce1                               | 119.8(3)   | O2 <sup>iii</sup> —Ce1—O4 <sup>iii</sup> | 61.15(11)   |
| C1—O1—Cu1 <sup>i</sup>                  | 111.4(3)   | O2 <sup>iv</sup> —Ce1—O4 <sup>iii</sup>  | 65.22(12)   |
| O1S—S1—C1S                              | 110.1(13)  | O1W—Ce1—O4 <sup>iv</sup>                 | 92.95(8)    |
| O1S—S1—C2S                              | 109.5(11)  | O5 <sup>iii</sup> —Ce1—O4 <sup>iv</sup>  | 128.53(11)  |
| C1S—S1—C2S                              | 98.7(11)   | O5—Ce1—O4 <sup>iv</sup>                  | 73.63(11)   |
| O3—Cu1—O6                               | 85.72(14)  | O5 <sup>iv</sup> —Ce1—O4 <sup>iv</sup>   | 62.9(1)     |
| O3—Cu1—O1 <sup>ii</sup>                 | 170.71(18) | O2—Ce1—O4 <sup>iv</sup>                  | 65.22(12)   |
| O6—Cu1—O1 <sup>ii</sup>                 | 92.18(16)  | O2 <sup>iii</sup> —Ce1—O4 <sup>iv</sup>  | 162.69(12)  |
| O3—Cu1—O3 <sup>ii</sup>                 | 95.93(18)  | O2 <sup>iv</sup> —Ce1—O4 <sup>iv</sup>   | 61.15(11)   |
| O6—Cu1—O3 <sup>ii</sup>                 | 175.39(16) | O4 <sup>iii</sup> —Ce1—O4 <sup>iv</sup>  | 119.738(14) |
| O1 <sup>ii</sup> —Cu1—O3 <sup>ii</sup>  | 85.51(14)  | O1W—Ce1—O4                               | 92.95(8)    |
| O1W—Ce1—O5 <sup>iii</sup>               | 137.96(8)  | O5 <sup>iii</sup> —Ce1—O4                | 73.63(11)   |
| O1W—Ce1—O5                              | 137.96(8)  | O5—Ce1—O4                                | 62.9(1)     |
| O5 <sup>iii</sup> —Ce1—O5               | 70.88(13)  | O5 <sup>iv</sup> —Ce1—O4                 | 128.53(11)  |
| O1W—Ce1—O5 <sup>iv</sup>                | 137.96(8)  | O2—Ce1—O4                                | 61.15(11)   |
| O5 <sup>iii</sup> —Ce1—O5 <sup>iv</sup> | 70.88(13)  | O2 <sup>iii</sup> —Ce1—O4                | 65.22(12)   |
| O5—Ce1—O5 <sup>iv</sup>                 | 70.88(13)  | O2 <sup>iv</sup> —Ce1—O4                 | 162.69(12)  |
| O1W—Ce1—O2                              | 69.88(9)   | O4 <sup>iii</sup> —Ce1—O4                | 119.738(14) |
| O5 <sup>iii</sup> —Ce1—O2               | 128.94(11) | O4 <sup>iv</sup> —Ce1—O4                 | 119.738(14) |

(i) 0.5+y, 0.5-z, 1-x; (ii) 1-z, -0.5+x, 0.5-y; (iii) z, x, y; (iv) y, z, x.

**Table S3.** Selected distances and angles for compound **PrCu<sub>3</sub>**

|                                          |           |                                         |           |
|------------------------------------------|-----------|-----------------------------------------|-----------|
| Cu1—O3                                   | 1.912(9)  | C2—O4                                   | 1.349(18) |
| Cu1—O3 <sup>i</sup>                      | 1.949(9)  | C2—O3                                   | 1.397(17) |
| Cu1—O1 <sup>i</sup>                      | 1.957(11) | C2—C3                                   | 1.53(2)   |
| Cu1—O6                                   | 1.98(1)   | C2—C1                                   | 1.63(2)   |
| Pr1—O1W                                  | 2.46(3)   | C3—O6                                   | 1.221(17) |
| Pr1—O5 <sup>ii</sup>                     | 2.532(10) | C3—O5                                   | 1.280(16) |
| Pr1—O5                                   | 2.532(10) | C1—O1                                   | 1.20(2)   |
| Pr1—O5 <sup>iii</sup>                    | 2.532(10) | C1—O2                                   | 1.32(2)   |
| Pr1—O2 <sup>ii</sup>                     | 2.570(12) | O3—Cu1 <sup>iv</sup>                    | 1.949(9)  |
| Pr1—O2                                   | 2.570(12) | O1—Cu1 <sup>iv</sup>                    | 1.957(11) |
| Pr1—O2 <sup>iii</sup>                    | 2.570(12) | S1—O1S                                  | 1.467(15) |
| Pr1—O4 <sup>iii</sup>                    | 2.624(11) | S1—C1S                                  | 1.76(2)   |
| Pr1—O4                                   | 2.624(11) | S1—C2S                                  | 1.779(14) |
| Pr1—O4 <sup>ii</sup>                     | 2.624(11) |                                         |           |
| O3—Cu1—O3 <sup>i</sup>                   | 95.5(5)   | O5 <sup>iii</sup> —Pr1—O4               | 73.3(3)   |
| O3—Cu1—O1 <sup>i</sup>                   | 172.6(5)  | O2 <sup>ii</sup> —Pr1—O4                | 161.1(3)  |
| O3 <sup>i</sup> —Cu1—O1 <sup>i</sup>     | 86.2(4)   | O2—Pr1—O4                               | 61.6(3)   |
| O3—Cu1—O6                                | 86.3(4)   | O2 <sup>iii</sup> —Pr1—O4               | 65.4(4)   |
| O3 <sup>i</sup> —Cu1—O6                  | 176.8(4)  | O4 <sup>iii</sup> —Pr1—O4               | 119.76(3) |
| O1 <sup>i</sup> —Cu1—O6                  | 91.7(5)   | O1W—Pr1—O4 <sup>ii</sup>                | 92.8(2)   |
| O1W—Pr1—O5 <sup>ii</sup>                 | 138.4(2)  | O5 <sup>ii</sup> —Pr1—O4 <sup>ii</sup>  | 63.7(3)   |
| O1W—Pr1—O5                               | 138.4(2)  | O5—Pr1—O4 <sup>ii</sup>                 | 73.3(3)   |
| O5 <sup>ii</sup> —Pr1—O5                 | 70.3(4)   | O5 <sup>iii</sup> —Pr1—O4 <sup>ii</sup> | 128.4(3)  |
| O1W—Pr1—O5 <sup>iii</sup>                | 138.4(2)  | O2 <sup>ii</sup> —Pr1—O4 <sup>ii</sup>  | 61.6(3)   |
| O5 <sup>ii</sup> —Pr1—O5 <sup>iii</sup>  | 70.3(4)   | O2—Pr1—O4 <sup>ii</sup>                 | 65.4(4)   |
| O5—Pr1—O5 <sup>iii</sup>                 | 70.3(4)   | O2 <sup>iii</sup> —Pr1—O4 <sup>ii</sup> | 161.1(3)  |
| O1W—Pr1—O2 <sup>ii</sup>                 | 68.4(3)   | O4 <sup>iii</sup> —Pr1—O4 <sup>ii</sup> | 119.76(4) |
| O5 <sup>ii</sup> —Pr1—O2 <sup>ii</sup>   | 70.1(4)   | O4—Pr1—O4 <sup>ii</sup>                 | 119.76(3) |
| O5—Pr1—O2 <sup>ii</sup>                  | 129.5(3)  | O4—C2—O3                                | 116.4(13) |
| O5 <sup>iii</sup> —Pr1—O2 <sup>ii</sup>  | 122.0(4)  | O4—C2—C3                                | 108.0(13) |
| O1W—Pr1—O2                               | 68.4(3)   | O3—C2—C3                                | 110.8(13) |
| O5 <sup>ii</sup> —Pr1—O2                 | 122.0(4)  | O4—C2—C1                                | 106.4(13) |
| O5—Pr1—O2                                | 70.1(4)   | O3—C2—C1                                | 107.8(12) |
| O5 <sup>iii</sup> —Pr1—O2                | 129.5(3)  | C3—C2—C1                                | 107.0(13) |
| O2 <sup>ii</sup> —Pr1—O2                 | 107.2(3)  | O6—C3—O5                                | 123.0(14) |
| O1W—Pr1—O2 <sup>iii</sup>                | 68.4(3)   | O6—C3—C2                                | 120.6(13) |
| O5 <sup>ii</sup> —Pr1—O2 <sup>iii</sup>  | 129.5(3)  | O5—C3—C2                                | 116.3(13) |
| O5—Pr1—O2 <sup>iii</sup>                 | 122.0(4)  | O1—C1—O2                                | 127.6(16) |
| O5 <sup>iii</sup> —Pr1—O2 <sup>iii</sup> | 70.1(4)   | O1—C1—C2                                | 119.3(14) |
| O2 <sup>ii</sup> —Pr1—O2 <sup>iii</sup>  | 107.2(3)  | O2—C1—C2                                | 112.7(15) |
| O2—Pr1—O2 <sup>iii</sup>                 | 107.2(3)  | C2—O3—Cu1                               | 110.0(9)  |
| O1W—Pr1—O4 <sup>iii</sup>                | 92.8(2)   | C2—O3—Cu1 <sup>iv</sup>                 | 112.3(9)  |
| O5 <sup>ii</sup> —Pr1—O4 <sup>iii</sup>  | 73.3(3)   | Cu1—O3—Cu1 <sup>iv</sup>                | 116.0(4)  |
| O5—Pr1—O4 <sup>iii</sup>                 | 128.4(3)  | C2—O4—Pr1                               | 108.2(9)  |
| O5 <sup>iii</sup> —Pr1—O4 <sup>iii</sup> | 63.7(3)   | C1—O2—Pr1                               | 119.7(10) |
| O2 <sup>ii</sup> —Pr1—O4 <sup>iii</sup>  | 65.4(4)   | C3—O5—Pr1                               | 118.1(9)  |
| O2—Pr1—O4 <sup>iii</sup>                 | 161.1(3)  | C3—O6—Cu1                               | 108.5(10) |
| O2 <sup>iii</sup> —Pr1—O4 <sup>iii</sup> | 61.6(3)   | C1—O1—Cu1 <sup>iv</sup>                 | 111.8(11) |
| O1W—Pr1—O4                               | 92.8(2)   | O1S—S1—C1S                              | 110.0(18) |
| O5 <sup>ii</sup> —Pr1—O4                 | 128.4(3)  | O1S—S1—C2S                              | 108.0(13) |
| O5—Pr1—O4                                | 63.7(3)   | C1S—S1—C2S                              | 99.6(13)  |

(i) 1.5-z, 1-x, 0.5+y; (ii) 0.5-y, 1-z, 0.5+x; (iii) -0.5+z, 0.5-x, 1-y; (iv) 1-y, -0.5+z, 1.5-x.

**Table S4.** Selected distances and angles for compound **NdCu<sub>3</sub>**

|                                        |            |                                         |             |
|----------------------------------------|------------|-----------------------------------------|-------------|
| C1—O1                                  | 1.239(9)   | O4—Nd                                   | 2.606(5)    |
| C1—O2                                  | 1.261(8)   | O2—Nd                                   | 2.548(6)    |
| C1—C2                                  | 1.527(10)  | O1—Cu1 <sup>i</sup>                     | 1.936(6)    |
| C2—O3                                  | 1.373(7)   | O1W—Nd                                  | 2.489(17)   |
| C2—O4                                  | 1.403(7)   | O1S—S1                                  | 1.503(12)   |
| C2—C3                                  | 1.569(9)   | Nd—O5 <sup>ii</sup>                     | 2.503(5)    |
| C3—O5                                  | 1.245(8)   | Nd—O5 <sup>iii</sup>                    | 2.503(5)    |
| C3—O6                                  | 1.242(8)   | Nd—O2 <sup>ii</sup>                     | 2.548(6)    |
| C1S—S1                                 | 1.772(10)  | Nd—O2 <sup>iii</sup>                    | 2.548(6)    |
| C2S—S1                                 | 2.66(5)    | Nd—O4 <sup>iii</sup>                    | 2.606(5)    |
| O6—Cu1                                 | 1.937(5)   | Nd—O4 <sup>ii</sup>                     | 2.606(5)    |
| O5—Nd                                  | 2.503(5)   | Cu1—O1 <sup>iv</sup>                    | 1.936(6)    |
| O3—Cu1                                 | 1.940(4)   | Cu1—O3 <sup>iv</sup>                    | 1.949(4)    |
| O3—Cu1 <sup>i</sup>                    | 1.949(4)   |                                         |             |
| O1—C1—O2                               | 125.6(7)   | O2—Nd—O2 <sup>ii</sup>                  | 108.36(15)  |
| O1—C1—C2                               | 119.3(6)   | O1W—Nd—O2 <sup>iii</sup>                | 69.44(14)   |
| O2—C1—C2                               | 114.9(6)   | O5—Nd—O2 <sup>iii</sup>                 | 128.83(16)  |
| O3—C2—O4                               | 113.5(5)   | O5 <sup>ii</sup> —Nd—O2 <sup>iii</sup>  | 121.18(18)  |
| O3—C2—C1                               | 111.2(5)   | O5 <sup>iii</sup> —Nd—O2 <sup>iii</sup> | 68.90(18)   |
| O4—C2—C1                               | 107.1(6)   | O2—Nd—O2 <sup>iii</sup>                 | 108.36(15)  |
| O3—C2—C3                               | 111.5(5)   | O2 <sup>ii</sup> —Nd—O2 <sup>iii</sup>  | 108.36(15)  |
| O4—C2—C3                               | 105.2(5)   | O1W—Nd—O4 <sup>iii</sup>                | 92.42(11)   |
| C1—C2—C3                               | 107.9(6)   | O5—Nd—O4 <sup>iii</sup>                 | 73.50(15)   |
| O5—C3—O6                               | 127.3(6)   | O5 <sup>ii</sup> —Nd—O4 <sup>iii</sup>  | 128.98(16)  |
| O5—C3—C2                               | 115.6(5)   | O5 <sup>iii</sup> —Nd—O4 <sup>iii</sup> | 63.93(15)   |
| O6—C3—C2                               | 117.1(6)   | O2—Nd—O4 <sup>iii</sup>                 | 64.84(16)   |
| C3—O6—Cu1                              | 111.6(4)   | O2 <sup>ii</sup> —Nd—O4 <sup>iii</sup>  | 161.76(19)  |
| C3—O5—Nd                               | 119.9(4)   | O2 <sup>iii</sup> —Nd—O4 <sup>iii</sup> | 61.31(15)   |
| C2—O3—Cu1                              | 110.5(4)   | O1W—Nd—O4                               | 92.42(11)   |
| C2—O3—Cu1 <sup>i</sup>                 | 110.9(3)   | O5—Nd—O4                                | 63.93(15)   |
| Cu1—O3—Cu1 <sup>i</sup>                | 114.6(2)   | O5 <sup>ii</sup> —Nd—O4                 | 73.50(15)   |
| C2—O4—Nd                               | 106.9(3)   | O5 <sup>iii</sup> —Nd—O4                | 128.98(16)  |
| C1—O2—Nd                               | 120.5(5)   | O2—Nd—O4                                | 61.31(15)   |
| C1—O1—Cu1 <sup>i</sup>                 | 111.2(5)   | O2 <sup>ii</sup> —Nd—O4                 | 64.84(16)   |
| O1S—S1—C1S                             | 106.9(12)  | O2 <sup>iii</sup> —Nd—O4                | 161.76(19)  |
| O1S—S1—C2S                             | 73.4(16)   | O4 <sup>iii</sup> —Nd—O4                | 119.823(16) |
| C1S—S1—C2S                             | 71.6(14)   | O1W—Nd—O4 <sup>ii</sup>                 | 92.42(11)   |
| O1W—Nd—O5                              | 138.15(12) | O5—Nd—O4 <sup>ii</sup>                  | 128.98(16)  |
| O1W—Nd—O5 <sup>ii</sup>                | 138.15(12) | O5 <sup>ii</sup> —Nd—O4 <sup>ii</sup>   | 63.93(15)   |
| O5—Nd—O5 <sup>ii</sup>                 | 70.60(18)  | O5 <sup>iii</sup> —Nd—O4 <sup>ii</sup>  | 73.50(15)   |
| O1W—Nd—O5 <sup>iii</sup>               | 138.15(12) | O2—Nd—O4 <sup>ii</sup>                  | 161.76(19)  |
| O5—Nd—O5 <sup>iii</sup>                | 70.60(18)  | O2 <sup>ii</sup> —Nd—O4 <sup>ii</sup>   | 61.31(15)   |
| O5 <sup>ii</sup> —Nd—O5 <sup>iii</sup> | 70.60(18)  | O2 <sup>iii</sup> —Nd—O4 <sup>ii</sup>  | 64.84(16)   |
| O1W—Nd—O2                              | 69.44(14)  | O4 <sup>iii</sup> —Nd—O4 <sup>ii</sup>  | 119.823(16) |
| O5—Nd—O2                               | 68.90(18)  | O4—Nd—O4 <sup>ii</sup>                  | 119.823(16) |
| O5 <sup>ii</sup> —Nd—O2                | 128.83(16) | O6—Cu1—O3                               | 86.1(2)     |
| O5 <sup>iii</sup> —Nd—O2               | 121.18(18) | O6—Cu1—O1 <sup>iv</sup>                 | 91.8(2)     |
| O1W—Nd—O2 <sup>ii</sup>                | 69.44(14)  | O3—Cu1—O1 <sup>iv</sup>                 | 170.3(3)    |
| O5—Nd—O2 <sup>ii</sup>                 | 121.18(18) | O6—Cu1—O3 <sup>iv</sup>                 | 175.9(2)    |
| O5 <sup>ii</sup> —Nd—O2 <sup>ii</sup>  | 68.90(18)  | O3—Cu1—O3 <sup>iv</sup>                 | 95.7(2)     |
| O5 <sup>iii</sup> —Nd—O2 <sup>ii</sup> | 128.83(16) | O1 <sup>iv</sup> —Cu1—O3 <sup>iv</sup>  | 85.7(2)     |

(i)  $y, 1+z, -1+x$ ; (ii)  $0.5+z, 1.5-x, 1-y$ ; (iii)  $1.5-y, 1-z, -0.5+x$ ; (iv)  $1+z, x, -1+y$ .

**Table S5.** Selected distances and angles for compound **EuCu<sub>3</sub>**

|             |           |                           |           |
|-------------|-----------|---------------------------|-----------|
| C1A—O2A     | 1.264(12) | C3E—O6E                   | 1.264(14) |
| C1A—O1A     | 1.270(13) | C3E—Eu3                   | 3.172(11) |
| C1A—C2A     | 1.521(11) | C3F—O6F                   | 1.239(14) |
| C1A—Eu1     | 3.165(10) | C3F—O5F                   | 1.251(13) |
| C1B—O1B     | 1.249(13) | C3F—O4FX                  | 1.466(19) |
| C1B—O2B     | 1.251(13) | Cu1—O6C                   | 1.937(8)  |
| C1B—C2B     | 1.528(14) | Cu1—O3A                   | 1.944(6)  |
| C1B—Eu2     | 3.263(10) | Cu1—O1A                   | 1.944(7)  |
| C1C—O2C     | 1.214(13) | Cu1—O3C                   | 1.945(6)  |
| C1C—O1C     | 1.283(14) | Cu1—O1S                   | 2.355(7)  |
| C1C—O4CX    | 1.529(19) | Cu2—O1B                   | 1.907(7)  |
| C1C—C2C     | 1.556(13) | Cu2—O3A                   | 1.940(6)  |
| C1D—O2D     | 1.247(14) | Cu2—O6A                   | 1.943(7)  |
| C1D—O1D     | 1.260(14) | Cu2—O3B                   | 1.955(6)  |
| C1D—C2D     | 1.531(12) | Cu3—O1C                   | 1.926(8)  |
| C1D—Eu2     | 3.193(11) | Cu3—O6B                   | 1.944(8)  |
| C1E—O1E     | 1.253(12) | Cu3—O3C                   | 1.947(6)  |
| C1E—O2E     | 1.253(13) | Cu3—O3B                   | 1.983(6)  |
| C1E—C2E     | 1.539(13) | Cu4—O6F                   | 1.922(7)  |
| C1E—Eu3     | 3.238(10) | Cu4—O1D                   | 1.937(8)  |
| C1F—O1F     | 1.231(13) | Cu4—O3F                   | 1.962(6)  |
| C1F—O2F     | 1.260(13) | Cu4—O3D                   | 1.963(6)  |
| C1F—O4FX    | 1.539(17) | Cu4—O2S                   | 2.313(7)  |
| C1F—C2F     | 1.555(12) | Cu5—O1E                   | 1.917(7)  |
| C1S1—S1     | 1.769(9)  | Cu5—O6D                   | 1.919(7)  |
| C1S2—S1     | 1.779(9)  | Cu5—O3D                   | 1.941(6)  |
| C2A—O3A     | 1.39(1)   | Cu5—O3E                   | 1.951(6)  |
| C2A—O4A     | 1.409(10) | Cu6—O3F                   | 1.930(6)  |
| C2A—C3A     | 1.577(12) | Cu6—O6E                   | 1.935(7)  |
| C2A—Eu1     | 3.149(9)  | Cu6—O1F                   | 1.946(8)  |
| C2B—O3B     | 1.37(1)   | Cu6—O3E                   | 1.978(6)  |
| C2B—O4B     | 1.419(11) | Eu1—O1W                   | 2.327(10) |
| C2B—C3B     | 1.527(13) | Eu1—O1W <sup>i</sup>      | 2.327(10) |
| C2C—O3C     | 1.370(11) | Eu1—O2A                   | 2.388(8)  |
| C2C—O4C     | 1.408(13) | Eu1—O2A <sup>i</sup>      | 2.388(8)  |
| C2C—C3C     | 1.567(13) | Eu1—O4A <sup>i</sup>      | 2.469(6)  |
| C2C—O4CX    | 1.780(17) | Eu1—O4A                   | 2.469(6)  |
| C2D—O3D     | 1.386(10) | Eu1—O5A                   | 2.583(8)  |
| C2D—O4D     | 1.405(11) | Eu1—O5A <sup>i</sup>      | 2.583(8)  |
| C2D—C3D     | 1.562(14) | Eu1—C2A <sup>i</sup>      | 3.149(9)  |
| C2D—Eu2     | 3.181(9)  | Eu1—C1A <sup>i</sup>      | 3.165(10) |
| C2E—O3E     | 1.359(10) | Eu2—O3W                   | 2.293(10) |
| C2E—O4E     | 1.400(12) | Eu2—O2W                   | 2.31(1)   |
| C2E—C3E     | 1.555(12) | Eu2—O5B                   | 2.375(9)  |
| C2F—O3F     | 1.389(9)  | Eu2—O2D                   | 2.436(9)  |
| C2F—O4F     | 1.393(13) | Eu2—O4D                   | 2.483(7)  |
| C2F—C3F     | 1.571(12) | Eu2—O2B                   | 2.495(8)  |
| C2F—O4FX    | 1.720(16) | Eu2—O5D                   | 2.608(9)  |
| C2S1—S2     | 1.771(8)  | Eu2—O4B                   | 2.692(7)  |
| C2S2—S2     | 1.780(9)  | Eu3—O5E                   | 2.333(9)  |
| C3A—O5A     | 1.229(11) | Eu3—O5E <sup>ii</sup>     | 2.333(9)  |
| C3A—O6A     | 1.264(12) | Eu3—O4W <sup>ii</sup>     | 2.352(12) |
| C3B—O5B     | 1.227(14) | Eu3—O4W                   | 2.352(12) |
| C3B—O6B     | 1.259(15) | Eu3—O2E                   | 2.445(8)  |
| C3B—Eu2     | 3.175(12) | Eu3—O2E <sup>ii</sup>     | 2.445(8)  |
| C3C—O5C     | 1.235(13) | Eu3—O4E <sup>ii</sup>     | 2.753(8)  |
| C3C—O6C     | 1.256(14) | Eu3—O4E                   | 2.753(8)  |
| C3C—O4CX    | 1.547(18) | Eu3—C3E <sup>ii</sup>     | 3.172(11) |
| C3D—O5D     | 1.218(13) | Eu3—C1E <sup>ii</sup>     | 3.238(10) |
| C3D—O6D     | 1.265(13) | O1S—S1                    | 1.536(7)  |
| C3E—O5E     | 1.255(13) | O2S—S2                    | 1.539(7)  |
| O2A—C1A—O1A | 124.1(9)  | O1W <sup>i</sup> —Eu1—C1A | 103.7(3)  |



|              |           |                                        |          |
|--------------|-----------|----------------------------------------|----------|
| O2A—C1A—C2A  | 117.6(9)  | O2A—Eu1—C1A                            | 20.9(2)  |
| O1A—C1A—C2A  | 118.3(8)  | O2A <sup>i</sup> —Eu1—C1A              | 101.9(3) |
| O2A—C1A—Eu1  | 42.3(5)   | O4A <sup>i</sup> —Eu1—C1A              | 90.4(2)  |
| O1A—C1A—Eu1  | 164.5(7)  | O4A—Eu1—C1A                            | 47.1(2)  |
| C2A—C1A—Eu1  | 75.5(5)   | O5A—Eu1—C1A                            | 60.6(3)  |
| O1B—C1B—O2B  | 124.(1)   | O5A <sup>i</sup> —Eu1—C1A              | 156.6(2) |
| O1B—C1B—C2B  | 116.4(9)  | C2A <sup>i</sup> —Eu1—C1A              | 110.5(2) |
| O2B—C1B—C2B  | 119.6(9)  | C2A—Eu1—C1A                            | 27.9(2)  |
| O1B—C1B—Eu2  | 166.8(8)  | O1W—Eu1—C1A <sup>i</sup>               | 103.7(3) |
| O2B—C1B—Eu2  | 42.8(5)   | O1W <sup>i</sup> —Eu1—C1A <sup>i</sup> | 126.8(3) |
| C2B—C1B—Eu2  | 76.8(5)   | O2A—Eu1—C1A <sup>i</sup>               | 101.9(3) |
| O2C—C1C—O1C  | 123.6(10) | O2A <sup>i</sup> —Eu1—C1A <sup>i</sup> | 20.9(2)  |
| O2C—C1C—O4CX | 94.3(11)  | O4A <sup>i</sup> —Eu1—C1A <sup>i</sup> | 47.1(2)  |
| O1C—C1C—O4CX | 104.5(10) | O4A—Eu1—C1A <sup>i</sup>               | 90.4(2)  |
| O2C—C1C—C2C  | 122.1(10) | O5A—Eu1—C1A <sup>i</sup>               | 156.6(2) |
| O1C—C1C—C2C  | 114.3(8)  | O5A <sup>i</sup> —Eu1—C1A <sup>i</sup> | 60.6(3)  |
| O4CX—C1C—C2C | 70.5(8)   | C2A <sup>i</sup> —Eu1—C1A <sup>i</sup> | 27.9(2)  |
| O2D—C1D—O1D  | 123.4(9)  | C2A—Eu1—C1A <sup>i</sup>               | 110.5(2) |
| O2D—C1D—C2D  | 118.1(9)  | C1A—Eu1—C1A <sup>i</sup>               | 105.8(4) |
| O1D—C1D—C2D  | 118.4(9)  | O3W—Eu2—O2W                            | 91.4(5)  |
| O2D—C1D—Eu2  | 43.1(6)   | O3W—Eu2—O5B                            | 94.1(4)  |
| O1D—C1D—Eu2  | 165.6(7)  | O2W—Eu2—O5B                            | 145.2(3) |
| C2D—C1D—Eu2  | 75.7(5)   | O3W—Eu2—O2D                            | 144.0(3) |
| O1E—C1E—O2E  | 123.3(10) | O2W—Eu2—O2D                            | 109.2(5) |
| O1E—C1E—C2E  | 117.1(8)  | O5B—Eu2—O2D                            | 85.6(4)  |
| O2E—C1E—C2E  | 119.7(9)  | O3W—Eu2—O4D                            | 92.3(3)  |
| O1E—C1E—Eu3  | 164.8(7)  | O2W—Eu2—O4D                            | 76.3(3)  |
| O2E—C1E—Eu3  | 41.5(5)   | O5B—Eu2—O4D                            | 137.6(3) |
| C2E—C1E—Eu3  | 78.2(5)   | O2D—Eu2—O4D                            | 65.8(3)  |
| O1F—C1F—O2F  | 123.8(9)  | O3W—Eu2—O2B                            | 143.6(3) |
| O1F—C1F—O4FX | 110.1(10) | O2W—Eu2—O2B                            | 80.0(4)  |
| O2F—C1F—O4FX | 88.5(9)   | O5B—Eu2—O2B                            | 75.3(3)  |
| O1F—C1F—C2F  | 117.4(8)  | O2D—Eu2—O2B                            | 70.9(3)  |
| O2F—C1F—C2F  | 118.8(8)  | O4D—Eu2—O2B                            | 119.2(2) |
| O4FX—C1F—C2F | 67.5(7)   | O3W—Eu2—O5D                            | 75.0(3)  |
| O3A—C2A—O4A  | 113.1(7)  | O2W—Eu2—O5D                            | 138.1(3) |
| O3A—C2A—C1A  | 111.8(7)  | O5B—Eu2—O5D                            | 76.3(3)  |
| O4A—C2A—C1A  | 106.1(7)  | O2D—Eu2—O5D                            | 70.0(3)  |
| O3A—C2A—C3A  | 110.5(6)  | O4D—Eu2—O5D                            | 65.1(2)  |
| O4A—C2A—C3A  | 107.8(7)  | O2B—Eu2—O5D                            | 132.8(4) |
| C1A—C2A—C3A  | 107.3(7)  | O3W—Eu2—O4B                            | 80.0(3)  |
| O3A—C2A—Eu1  | 162.2(6)  | O2W—Eu2—O4B                            | 84.6(3)  |
| O4A—C2A—Eu1  | 49.1(4)   | O5B—Eu2—O4B                            | 62.7(3)  |
| C1A—C2A—Eu1  | 76.7(5)   | O2D—Eu2—O4B                            | 129.7(2) |
| C3A—C2A—Eu1  | 80.3(5)   | O4D—Eu2—O4B                            | 159.2(2) |
| O3B—C2B—O4B  | 113.1(8)  | O2B—Eu2—O4B                            | 64.1(2)  |
| O3B—C2B—C3B  | 112.6(8)  | O5D—Eu2—O4B                            | 129.7(2) |
| O4B—C2B—C3B  | 101.2(7)  | O3W—Eu2—C3B                            | 96.3(4)  |
| O3B—C2B—C1B  | 111.2(7)  | O2W—Eu2—C3B                            | 125.7(3) |
| O4B—C2B—C1B  | 108.2(8)  | O5B—Eu2—C3B                            | 19.5(3)  |
| C3B—C2B—C1B  | 109.9(9)  | O2D—Eu2—C3B                            | 95.1(3)  |
| O3C—C2C—O4C  | 112.2(8)  | O4D—Eu2—C3B                            | 156.0(3) |
| O3C—C2C—C1C  | 111.4(8)  | O2B—Eu2—C3B                            | 62.8(3)  |
| O4C—C2C—C1C  | 109.2(8)  | O5D—Eu2—C3B                            | 95.5(3)  |
| O3C—C2C—C3C  | 111.9(8)  | O4B—Eu2—C3B                            | 44.8(3)  |
| O4C—C2C—C3C  | 104.8(8)  | O3W—Eu2—C2D                            | 100.7(3) |
| C1C—C2C—C3C  | 107.1(9)  | O2W—Eu2—C2D                            | 99.7(3)  |
| O3C—C2C—O4CX | 117.5(9)  | O5B—Eu2—C2D                            | 112.9(3) |
| O4C—C2C—O4CX | 130.3(9)  | O2D—Eu2—C2D                            | 48.1(2)  |
| C1C—C2C—O4CX | 54.0(7)   | O4D—Eu2—C2D                            | 25.1(2)  |
| C3C—C2C—O4CX | 54.6(7)   | O2B—Eu2—C2D                            | 115.5(3) |
| O3D—C2D—O4D  | 112.9(8)  | O5D—Eu2—C2D                            | 47.0(2)  |
| O3D—C2D—C1D  | 110.9(8)  | O4B—Eu2—C2D                            | 175.7(2) |
| O4D—C2D—C1D  | 104.4(8)  | C3B—Eu2—C2D                            | 131.0(3) |
| O3D—C2D—C3D  | 111.6(7)  | O3W—Eu2—C1D                            | 127.3(3) |

|              |           |                                          |          |
|--------------|-----------|------------------------------------------|----------|
| O4D—C2D—C3D  | 108.4(8)  | O2W—Eu2—C1D                              | 104.3(4) |
| C1D—C2D—C3D  | 108.4(8)  | O5B—Eu2—C1D                              | 99.5(3)  |
| O3D—C2D—Eu2  | 161.2(6)  | O2D—Eu2—C1D                              | 20.5(3)  |
| O4D—C2D—Eu2  | 48.5(4)   | O4D—Eu2—C1D                              | 46.2(3)  |
| C1D—C2D—Eu2  | 76.5(5)   | O2B—Eu2—C1D                              | 89.1(3)  |
| C3D—C2D—Eu2  | 80.8(5)   | O5D—Eu2—C1D                              | 59.7(3)  |
| O3E—C2E—O4E  | 115.1(8)  | O4B—Eu2—C1D                              | 150.1(2) |
| O3E—C2E—C1E  | 110.5(7)  | C3B—Eu2—C1D                              | 112.6(3) |
| O4E—C2E—C1E  | 107.9(7)  | C2D—Eu2—C1D                              | 27.8(2)  |
| O3E—C2E—C3E  | 112.5(7)  | O3W—Eu2—C1B                              | 126.0(3) |
| O4E—C2E—C3E  | 102.3(7)  | O2W—Eu2—C1B                              | 87.7(3)  |
| C1E—C2E—C3E  | 108.1(8)  | O5B—Eu2—C1B                              | 61.5(3)  |
| O3F—C2F—O4F  | 112.1(7)  | O2D—Eu2—C1B                              | 85.2(3)  |
| O3F—C2F—C1F  | 108.9(7)  | O4D—Eu2—C1B                              | 139.1(3) |
| O4F—C2F—C1F  | 110.4(7)  | O2B—Eu2—C1B                              | 19.9(3)  |
| O3F—C2F—C3F  | 111.1(7)  | O5D—Eu2—C1B                              | 132.5(3) |
| O4F—C2F—C3F  | 106.2(8)  | O4B—Eu2—C1B                              | 46.1(2)  |
| C1F—C2F—C3F  | 108.0(8)  | C3B—Eu2—C1B                              | 45.7(3)  |
| O3F—C2F—O4FX | 119.7(8)  | C2D—Eu2—C1B                              | 132.7(2) |
| O4F—C2F—O4FX | 128.1(8)  | C1D—Eu2—C1B                              | 105.0(3) |
| C1F—C2F—O4FX | 55.8(7)   | O5E—Eu3—O5E <sup>ii</sup>                | 92.5(5)  |
| C3F—C2F—O4FX | 52.7(7)   | O5E—Eu3—O4W <sup>ii</sup>                | 86.8(4)  |
| O5A—C3A—O6A  | 127.3(9)  | O5E <sup>ii</sup> —Eu3—O4W <sup>ii</sup> | 140.6(3) |
| O5A—C3A—C2A  | 117.0(9)  | O5E—Eu3—O4W                              | 140.6(3) |
| O6A—C3A—C2A  | 115.8(7)  | O5E <sup>ii</sup> —Eu3—O4W               | 86.8(4)  |
| O5B—C3B—O6B  | 122.5(10) | O4W <sup>ii</sup> —Eu3—O4W               | 117.5(8) |
| O5B—C3B—C2B  | 119.8(10) | O5E—Eu3—O2E                              | 76.2(3)  |
| O6B—C3B—C2B  | 117.6(9)  | O5E <sup>ii</sup> —Eu3—O2E               | 143.6(3) |
| O5B—C3B—Eu2  | 40.2(6)   | O4W <sup>ii</sup> —Eu3—O2E               | 74.1(3)  |
| O6B—C3B—Eu2  | 161.8(7)  | O4W—Eu3—O2E                              | 81.2(4)  |
| C2B—C3B—Eu2  | 79.8(6)   | O5E—Eu3—O2E <sup>ii</sup>                | 143.6(3) |
| O5C—C3C—O6C  | 126.2(10) | O5E <sup>ii</sup> —Eu3—O2E <sup>ii</sup> | 76.2(3)  |
| O5C—C3C—O4CX | 84.5(10)  | O4W <sup>ii</sup> —Eu3—O2E <sup>ii</sup> | 81.2(4)  |
| O6C—C3C—O4CX | 112.5(11) | O4W—Eu3—O2E <sup>ii</sup>                | 74.1(3)  |
| O5C—C3C—C2C  | 117.7(10) | O2E—Eu3—O2E <sup>ii</sup>                | 131.6(4) |
| O6C—C3C—C2C  | 116.0(8)  | O5E—Eu3—O4E <sup>ii</sup>                | 79.9(2)  |
| O4CX—C3C—C2C | 69.7(8)   | O5E <sup>ii</sup> —Eu3—O4E <sup>ii</sup> | 62.6(3)  |
| O5D—C3D—O6D  | 128.9(10) | O4W <sup>ii</sup> —Eu3—O4E <sup>ii</sup> | 78.5(4)  |
| O5D—C3D—C2D  | 116.3(9)  | O4W—Eu3—O4E <sup>ii</sup>                | 132.5(3) |
| O6D—C3D—C2D  | 114.8(8)  | O2E—Eu3—O4E <sup>ii</sup>                | 144.4(3) |
| O5E—C3E—O6E  | 124.(1)   | O2E <sup>ii</sup> —Eu3—O4E <sup>ii</sup> | 64.1(2)  |
| O5E—C3E—C2E  | 119.2(9)  | O5E—Eu3—O4E                              | 62.6(3)  |
| O6E—C3E—C2E  | 116.8(8)  | O5E <sup>ii</sup> —Eu3—O4E               | 79.9(2)  |
| O5E—C3E—Eu3  | 38.9(5)   | O4W <sup>ii</sup> —Eu3—O4E               | 132.5(3) |
| O6E—C3E—Eu3  | 162.7(7)  | O4W—Eu3—O4E                              | 78.5(4)  |
| C2E—C3E—Eu3  | 80.3(5)   | O2E—Eu3—O4E                              | 64.1(2)  |
| O6F—C3F—O5F  | 126.8(9)  | O2E <sup>ii</sup> —Eu3—O4E               | 144.4(3) |
| O6F—C3F—O4FX | 114.3(11) | O4E <sup>ii</sup> —Eu3—O4E               | 125.4(3) |
| O5F—C3F—O4FX | 85.9(10)  | O5E—Eu3—C3E <sup>ii</sup>                | 96.2(3)  |
| O6F—C3F—C2F  | 116.8(8)  | O5E <sup>ii</sup> —Eu3—C3E <sup>ii</sup> | 19.7(3)  |
| O5F—C3F—C2F  | 116.4(9)  | O4W <sup>ii</sup> —Eu3—C3E <sup>ii</sup> | 121.2(3) |
| O4FX—C3F—C2F | 68.9(8)   | O4W—Eu3—C3E <sup>ii</sup>                | 96.2(4)  |
| O6C—Cu1—O3A  | 170.9(3)  | O2E—Eu3—C3E <sup>ii</sup>                | 162.9(3) |
| O6C—Cu1—O1A  | 90.1(3)   | O2E <sup>ii</sup> —Eu3—C3E <sup>ii</sup> | 62.5(3)  |
| O3A—Cu1—O1A  | 85.9(3)   | O4E <sup>ii</sup> —Eu3—C3E <sup>ii</sup> | 45.0(2)  |
| O6C—Cu1—O3C  | 85.4(3)   | O4E—Eu3—C3E <sup>ii</sup>                | 98.8(2)  |
| O3A—Cu1—O3C  | 96.8(3)   | O5E—Eu3—C3E                              | 19.7(3)  |
| O1A—Cu1—O3C  | 167.7(3)  | O5E <sup>ii</sup> —Eu3—C3E               | 96.2(3)  |
| O6C—Cu1—O1S  | 106.1(3)  | O4W <sup>ii</sup> —Eu3—C3E               | 96.2(4)  |
| O3A—Cu1—O1S  | 82.9(2)   | O4W—Eu3—C3E                              | 121.2(3) |
| O1A—Cu1—O1S  | 106.1(3)  | O2E—Eu3—C3E                              | 62.5(3)  |
| O3C—Cu1—O1S  | 86.1(3)   | O2E <sup>ii</sup> —Eu3—C3E               | 162.9(3) |
| O1B—Cu2—O3A  | 172.0(3)  | O4E <sup>ii</sup> —Eu3—C3E               | 98.8(2)  |
| O1B—Cu2—O6A  | 91.1(3)   | O4E—Eu3—C3E                              | 45.0(2)  |
| O3A—Cu2—O6A  | 85.0(3)   | C3E <sup>ii</sup> —Eu3—C3E               | 105.8(4) |

|                                        |          |                                          |           |
|----------------------------------------|----------|------------------------------------------|-----------|
| O1B—Cu2—O3B                            | 84.3(3)  | O5E—Eu3—C1E                              | 62.8(3)   |
| O3A—Cu2—O3B                            | 98.7(3)  | O5E <sup>ii</sup> —Eu3—C1E               | 125.7(3)  |
| O6A—Cu2—O3B                            | 172.5(3) | O4W <sup>ii</sup> —Eu3—C1E               | 88.7(3)   |
| O1C—Cu3—O6B                            | 90.3(4)  | O4W—Eu3—C1E                              | 85.9(3)   |
| O1C—Cu3—O3C                            | 84.3(3)  | O2E—Eu3—C1E                              | 19.8(3)   |
| O6B—Cu3—O3C                            | 174.2(3) | O2E <sup>ii</sup> —Eu3—C1E               | 150.0(3)  |
| O1C—Cu3—O3B                            | 170.2(3) | O4E <sup>ii</sup> —Eu3—C1E               | 141.3(2)  |
| O6B—Cu3—O3B                            | 84.7(3)  | O4E—Eu3—C1E                              | 45.9(2)   |
| O3C—Cu3—O3B                            | 100.9(3) | C3E <sup>ii</sup> —Eu3—C1E               | 143.6(3)  |
| O6F—Cu4—O1D                            | 90.2(3)  | C3E—Eu3—C1E                              | 46.0(3)   |
| O6F—Cu4—O3F                            | 85.6(3)  | O5E—Eu3—C1E <sup>ii</sup>                | 125.7(3)  |
| O1D—Cu4—O3F                            | 169.0(4) | O5E <sup>ii</sup> —Eu3—C1E <sup>ii</sup> | 62.8(3)   |
| O6F—Cu4—O3D                            | 169.1(3) | O4W <sup>ii</sup> —Eu3—C1E <sup>ii</sup> | 85.9(3)   |
| O1D—Cu4—O3D                            | 85.5(3)  | O4W—Eu3—C1E <sup>ii</sup>                | 88.7(3)   |
| O3F—Cu4—O3D                            | 96.8(3)  | O2E—Eu3—C1E <sup>ii</sup>                | 150.0(3)  |
| O6F—Cu4—O2S                            | 105.9(3) | O2E <sup>ii</sup> —Eu3—C1E <sup>ii</sup> | 19.8(3)   |
| O1D—Cu4—O2S                            | 103.7(4) | O4E <sup>ii</sup> —Eu3—C1E <sup>ii</sup> | 45.9(2)   |
| O3F—Cu4—O2S                            | 87.2(3)  | O4E—Eu3—C1E <sup>ii</sup>                | 141.3(2)  |
| O3D—Cu4—O2S                            | 84.9(3)  | C3E <sup>ii</sup> —Eu3—C1E <sup>ii</sup> | 46.0(3)   |
| O1E—Cu5—O6D                            | 91.4(3)  | C3E—Eu3—C1E <sup>ii</sup>                | 143.6(3)  |
| O1E—Cu5—O3D                            | 173.6(3) | C1E—Eu3—C1E <sup>ii</sup>                | 169.5(4)  |
| O6D—Cu5—O3D                            | 85.1(3)  | C1A—O1A—Cu1                              | 110.9(6)  |
| O1E—Cu5—O3E                            | 84.2(3)  | C1B—O1B—Cu2                              | 115.1(7)  |
| O6D—Cu5—O3E                            | 171.3(3) | C1C—O1C—Cu3                              | 114.6(6)  |
| O3D—Cu5—O3E                            | 98.5(3)  | C1D—O1D—Cu4                              | 110.4(7)  |
| O3F—Cu6—O6E                            | 173.8(3) | C1E—O1E—Cu5                              | 114.0(7)  |
| O3F—Cu6—O1F                            | 83.9(3)  | C1F—O1F—Cu6                              | 113.5(7)  |
| O6E—Cu6—O1F                            | 90.2(3)  | S1—O1S—Cu1                               | 133.4(4)  |
| O3F—Cu6—O3E                            | 100.8(3) | C1A—O2A—Eu1                              | 116.8(6)  |
| O6E—Cu6—O3E                            | 85.2(3)  | C1B—O2B—Eu2                              | 117.2(7)  |
| O1F—Cu6—O3E                            | 172.8(3) | C1D—O2D—Eu2                              | 116.4(7)  |
| O1W—Eu1—O1W <sup>i</sup>               | 92.3(7)  | C1E—O2E—Eu3                              | 118.6(7)  |
| O1W—Eu1—O2A                            | 145.3(3) | S2—O2S—Cu4                               | 131.0(4)  |
| O1W <sup>i</sup> —Eu1—O2A              | 90.8(4)  | C2A—O3A—Cu2                              | 112.6(5)  |
| O1W—Eu1—O2A <sup>i</sup>               | 90.8(4)  | C2A—O3A—Cu1                              | 110.7(5)  |
| O1W <sup>i</sup> —Eu1—O2A <sup>i</sup> | 145.3(3) | Cu2—O3A—Cu1                              | 112.9(3)  |
| O2A—Eu1—O2A <sup>i</sup>               | 105.7(5) | C2B—O3B—Cu2                              | 112.0(5)  |
| O1W—Eu1—O4A <sup>i</sup>               | 140.8(3) | C2B—O3B—Cu3                              | 110.1(6)  |
| O1W <sup>i</sup> —Eu1—O4A <sup>i</sup> | 89.9(3)  | Cu2—O3B—Cu3                              | 112.8(3)  |
| O2A—Eu1—O4A <sup>i</sup>               | 73.8(2)  | C2C—O3C—Cu1                              | 111.6(5)  |
| O2A <sup>i</sup> —Eu1—O4A <sup>i</sup> | 66.8(2)  | C2C—O3C—Cu3                              | 113.0(6)  |
| O1W—Eu1—O4A                            | 89.9(3)  | Cu1—O3C—Cu3                              | 110.7(3)  |
| O1W <sup>i</sup> —Eu1—O4A              | 140.8(3) | C2D—O3D—Cu5                              | 112.0(5)  |
| O2A—Eu1—O4A                            | 66.8(2)  | C2D—O3D—Cu4                              | 110.6(5)  |
| O2A <sup>i</sup> —Eu1—O4A              | 73.8(2)  | Cu5—O3D—Cu4                              | 110.3(3)  |
| O4A <sup>i</sup> —Eu1—O4A              | 112.2(3) | C2E—O3E—Cu5                              | 113.0(5)  |
| O1W—Eu1—O5A                            | 75.2(3)  | C2E—O3E—Cu6                              | 110.1(5)  |
| O1W <sup>i</sup> —Eu1—O5A              | 76.4(3)  | Cu5—O3E—Cu6                              | 114.6(3)  |
| O2A—Eu1—O5A                            | 71.9(3)  | C2F—O3F—Cu6                              | 113.8(5)  |
| O2A <sup>i</sup> —Eu1—O5A              | 137.4(2) | C2F—O3F—Cu4                              | 110.7(5)  |
| O4A <sup>i</sup> —Eu1—O5A              | 142.7(3) | Cu6—O3F—Cu4                              | 110.1(3)  |
| O4A—Eu1—O5A                            | 66.3(2)  | C2A—O4A—Eu1                              | 105.3(5)  |
| O1W—Eu1—O5A <sup>i</sup>               | 76.4(3)  | C2B—O4B—Eu2                              | 100.8(5)  |
| O1W <sup>i</sup> —Eu1—O5A <sup>i</sup> | 75.2(3)  | C2D—O4D—Eu2                              | 106.5(5)  |
| O2A—Eu1—O5A <sup>i</sup>               | 137.4(2) | C2E—O4E—Eu3                              | 99.5(5)   |
| O2A <sup>i</sup> —Eu1—O5A <sup>i</sup> | 71.9(3)  | C3A—O5A—Eu1                              | 113.7(7)  |
| O4A <sup>i</sup> —Eu1—O5A <sup>i</sup> | 66.3(2)  | C3B—O5B—Eu2                              | 120.3(8)  |
| O4A—Eu1—O5A <sup>i</sup>               | 142.7(3) | C3D—O5D—Eu2                              | 115.0(7)  |
| O5A—Eu1—O5A <sup>i</sup>               | 138.6(4) | C1C—O4CX—C3C                             | 109.6(11) |
| O1W—Eu1—C2A <sup>i</sup>               | 116.3(3) | C1C—O4CX—C2C                             | 55.5(7)   |
| O1W <sup>i</sup> —Eu1—C2A <sup>i</sup> | 99.9(3)  | C3C—O4CX—C2C                             | 55.7(7)   |
| O2A—Eu1—C2A <sup>i</sup>               | 97.2(2)  | C3E—O5E—Eu3                              | 121.4(7)  |
| O2A <sup>i</sup> —Eu1—C2A <sup>i</sup> | 48.7(2)  | C3F—O4FX—C1F                             | 114.6(11) |
| O4A <sup>i</sup> —Eu1—C2A <sup>i</sup> | 25.6(2)  | C3F—O4FX—C2F                             | 58.4(7)   |
| O4A—Eu1—C2A <sup>i</sup>               | 114.1(2) | C1F—O4FX—C2F                             | 56.7(6)   |

|                                        |          |              |          |
|----------------------------------------|----------|--------------|----------|
| O5A—Eu1—C2A <sup>i</sup>               | 168.3(3) | C3A—O6A—Cu2  | 113.6(6) |
| O5A <sup>i</sup> —Eu1—C2A <sup>i</sup> | 48.2(2)  | C3B—O6B—Cu3  | 112.0(7) |
| O1W—Eu1—C2A                            | 99.9(3)  | C3C—O6C—Cu1  | 113.6(6) |
| O1W <sup>i</sup> —Eu1—C2A              | 116.3(3) | C3D—O6D—Cu5  | 115.0(7) |
| O2A—Eu1—C2A                            | 48.7(2)  | C3E—O6E—Cu6  | 112.1(6) |
| O2A <sup>i</sup> —Eu1—C2A              | 97.2(2)  | C3F—O6F—Cu4  | 114.1(6) |
| O4A <sup>i</sup> —Eu1—C2A              | 114.1(2) | O1S—S1—C1S1  | 105.5(7) |
| O4A—Eu1—C2A                            | 25.6(2)  | O1S—S1—C1S2  | 105.1(6) |
| O5A—Eu1—C2A                            | 48.2(2)  | C1S1—S1—C1S2 | 98.6(9)  |
| O5A <sup>i</sup> —Eu1—C2A              | 168.3(3) | O2S—S2—C2S1  | 106.0(5) |
| C2A <sup>i</sup> —Eu1—C2A              | 127.4(3) | O2S—S2—C2S2  | 102.7(8) |
| O1W—Eu1—C1A                            | 126.8(3) | C2S1—S2—C2S2 | 98.5(9)  |

(i) 1-x, y, 2.5-z; (ii) -x, y, 0.5-z.

## References

1. A. V. Lapitskaya and S. B. Pirkes, *Zh. Neorg. Khim.*, 1971, **16**, 369-371.
2. K. Nakamoto, *Infrared and Raman Spectra of Inorganic and Coordination Compounds, 3rd Edition*, John Wiley & Sons, New York, 1977.

Full reference for Gaussian 09 code

Gaussian 09, Revision A.02, M. J. Frisch, G. W. Trucks, H. B. Schlegel, G. E. Scuseria, M. A. Robb, J. R. Cheeseman, G. Scalmani, V. Barone, B. Mennucci, G. A. Petersson, H. Nakatsuji, M. Caricato, X. Li, H. P. Hratchian, A. F. Izmaylov, J. Bloino, G. Zheng, J. L. Sonnenberg, M. Hada, M. Ehara, K. Toyota, R. Fukuda, J. Hasegawa, M. Ishida, T. Nakajima, Y. Honda, O. Kitao, H. Nakai, T. Vreven, J. A. Montgomery, Jr., J. E. Peralta, F. Ogliaro, M. Bearpark, J. J. Heyd, E. Brothers, K. N. Kudin, V. N. Staroverov, R. Kobayashi, J. Normand, K. Raghavachari, A. Rendell, J. C. Burant, S. S. Iyengar, J. Tomasi, M. Cossi, N. Rega, J. M. Millam, M. Klene, J. E. Knox, J. B. Cross, V. Bakken, C. Adamo, J. Jaramillo, R. Gomperts, R. E. Stratmann, O. Yazyev, A. J. Austin, R. Cammi, C. Pomelli, J. W. Ochterski, R. L. Martin, K. Morokuma, V. G. Zakrzewski, G. A. Voth, P. Salvador, J. J. Dannenberg, S. Dapprich, A. D. Daniels, O. Farkas, J. B. Foresman, J. V. Ortiz, J. Cioslowski, and D. J. Fox, Gaussian, Inc., Wallingford CT, 2009.
